# Supplementary material for: Gene expression profiles in skeletal muscle after gene electrotransfer
Source: PubMed Central journal article supplement (PMC1925113; doi:10.1186/1471-2199-8-56), 2007-06-29

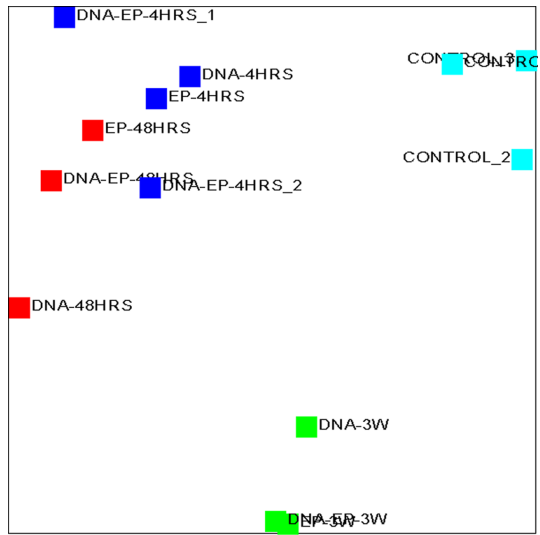

Supplement: 1471-2199-8-56-S3.pdf [file 1471-2199-8-56-S3.pdf]
