# Supplementary material for: Gene expression profiles in skeletal muscle after gene electrotransfer
Source: Springer Nature journal article supplement (doi:10.1186/1471-2199-8-56), 2007-01-01

CONTROL\_2  
CONTROL\_3  
EP-3W  
CONTROL\_1  
EP-48HRS  
EP-4HRS  
DNA-4HRS  
DNA-EP-3W  
DNA-48HRS  
DNA-EP-48HRS  
DNA-EP-4HRS\_1  
DNA-3W  
DNA-EP-4HRS\_2

EP  
DNA  
Time

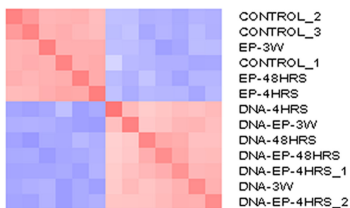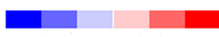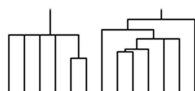

EP-3W  
EP-48HRS  
EP-4HRS  
CONTROL\_1  
CONTROL\_2  
CONTROL\_3  
DNA-EP-3W  
DNA-EP-48HRS  
DNA-EP-4HRS\_1  
DNA-48HRS  
DNA-EP-4HRS\_2  
DNA-3W  
DNA-4HRS

EP  
DNA  
Time

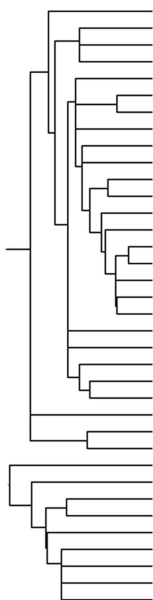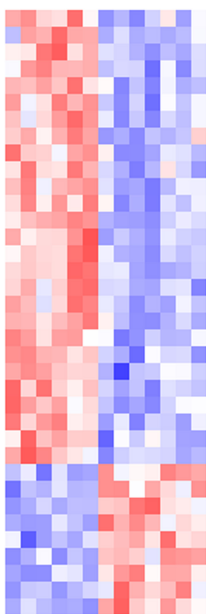

BM206565 RIKEN cDNA  
NM026011 ADP-ribosyl.  
NM011992 reticulocalbin 2  
AI451985 MAPKK pt 3  
AV380561 RIKEN cDNA  
NM016682 sentrin, E1B  
AA839814 Gm237  
BM232436 tripartite pt 23  
M32308 Zinc finger pt  
BB041813 Serum resp pt  
BG065679 pt phosphatase  
AF483488 FK506 pt 1a  
BG070008 RIKEN cDNA  
BI905090 ceramide kinase  
AA920031 Nuc transport  
BC004810 polymerase II  
BB044517 Hsp40 homolog  
AV031454 Mitochond pt S2  
AK014511 Ras-like, fam 12  
BQ176608 v-Ki-ras2 homo  
BB172310 RIKEN cDNA  
AK013111 amino adipate ...  
AV144956 Basic leucine zip  
BB771960 Transmembr 33  
AK009343 Ser peptidase in  
NM026024 ubiquitin E2T  
BC002064 pleiotrophin  
BF660912 RIKEN cDNA  
AV327777 Mitochon pt S31  
NM138303 Yip1, member 2  
BB117494 Arnt2  
BB486335 RIKEN cDNA  
NM009626 alcohol dehydro  
AK018300 RIKEN cDNA  
BB609428 Translocase 7  
BB535337 RIKEN cDNA

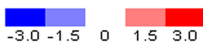

Supplement: 12867_2007_193_MOESM21_ESM.pdf [file 12867_2007_193_MOESM21_ESM.pdf]
