# Supplementary material for: Gene expression profiles in skeletal muscle after gene electrotransfer
Source: Springer Nature journal article supplement (doi:10.1186/1471-2199-8-56), 2007-01-01

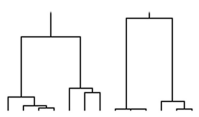

DNA-EP-4HRS\_2  
 EP-48HRS  
 DNA-48HRS  
 DNA-EP-48HRS  
 EP-4HRS  
 DNA-4HRS  
 DNA-EP-4HRS\_1  
 EP-3W  
 DNA-3W  
 DNA-EP-3W  
 CONTROL\_1  
 CONTROL\_2  
 CONTROL\_3

+ + - - + + - - + + - - + + - - + + - -  
 + - + + - - + + - - + + - - + + - - + + - -  
 1 2 2 2 1 1 1 3 3 3 C C C

EP  
 DNA  
 Time

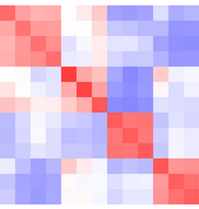

-3.0 -1.8 -0.6 0.6 1.8 3.0

DNA-EP-4HRS\_2  
 EP-48HRS  
 DNA-48HRS  
 DNA-EP-48HRS  
 EP-4HRS  
 DNA-4HRS  
 DNA-EP-4HRS\_1  
 EP-3W  
 DNA-3W  
 DNA-EP-3W  
 CONTROL\_1  
 CONTROL\_2  
 CONTROL\_3

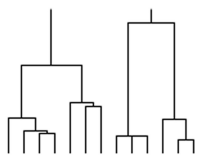

DNA-EP-4HRS\_2  
 EP-48HRS  
 DNA-48HRS  
 DNA-EP-48HRS  
 EP-4HRS  
 DNA-4HRS  
 DNA-EP-4HRS\_1  
 EP-3W  
 DNA-3W  
 DNA-EP-3W  
 CONTROL\_1  
 CONTROL\_2  
 CONTROL\_3

+ + - - + + - - + + - - + + - - + + - -  
 + - + + - - + + - - + + - - + + - - + + - -  
 1 2 2 2 1 1 1 3 3 3 C C C

EP  
 DNA  
 Time

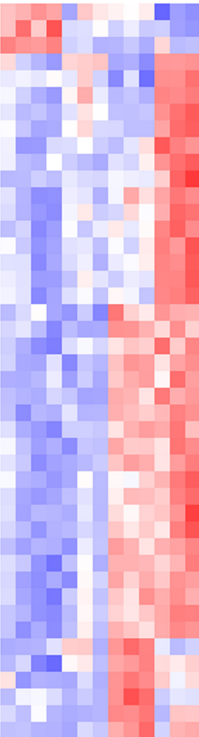

-3.0 -1.5 0 1.5 3.0

BG063065 Mus cDNA  
 BE992311 boIA-like 2  
 C76734 Cl channel K  
 AV174616 Tr. ERBB2  
 BQ177047 G-pt r 146  
 BC013486 Kruppel f15  
 AW542672 arrestin d2  
 AI118064 PPAR alpha  
 BI661719 SWI/SNF  
 NM011862 K vol. chan  
 BB083808 G-pt r 116  
 AA709668 RIKEN cDNA  
 BB364488 forkhead O3  
 BF465109 Mus cDNA  
 BG069516 Sol carrier 6  
 BM236870 Euk. ini f 5B  
 BG068704 Ubi. pept.48  
 AV269574 Folliculin  
 BC026496 ABC1, m 8a  
 U22016 Nuc r co-rep  
 BQ174442 IKEN cDNA  
 AY032852 nisharin  
 BF466929 RIKEN cDNA  
 BQ174383 RIKEN cDNA  
 BM240147Pt geranyl.  
 BB188557 RIKEN cDNA  
 BG864583 host cell fc1  
 BM202561 CCR4-NOT  
 AW556858RIKEN cDNA  
 AW495537RIKEN cDNA  
 AW556696 arginine gl.  
 AI415636 RIKEN cDNA  
 AK009333RIKEN cDNA  
 AV232599Synaptophy.  
 BB760085 eyes absent  
 BB326929 SH3-dom pt  
 BM206023RIKEN cDNA  
 AA216953 NOD-deriv  
 AF133669 ADP-ribo. f6  
 BM122201 DNA segm  
 AK011714 WD repeat  
 BG069663 Mus cDNA  
 NM026252 cyt polyA 4  
 AK017426 RIKEN cDNA

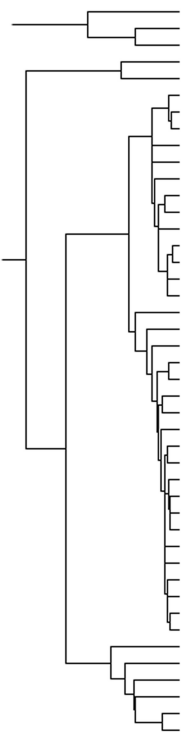

Supplement: 12867_2007_193_MOESM22_ESM.pdf [file 12867_2007_193_MOESM22_ESM.pdf]
