# Supplementary material for: Gene expression profiles in skeletal muscle after gene electrotransfer
Source: Springer Nature journal article supplement (doi:10.1186/1471-2199-8-56), 2007-01-01

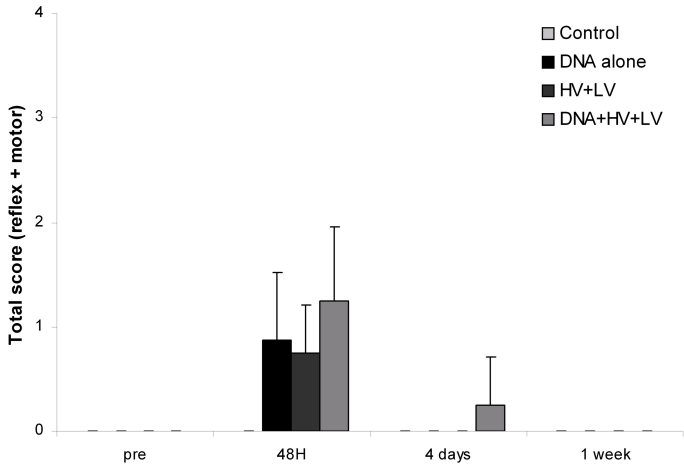

Supplement: 12867_2007_193_MOESM24_ESM.pdf [file 12867_2007_193_MOESM24_ESM.pdf]
